# Supplementary material for: A Year-Round Measurement of Water-Soluble Trace and Rare Earth Elements in Arctic Aerosol: Possible Inorganic Tracers of Specific Events
Source: MDPI journal article supplement (doi:10.3390/atmos12060694), 2021-05-29
Supplement: s1 [file s1]

## Article

# A Year-Round Measurement of Water-Soluble Trace and Rare Earth Elements in Arctic Aerosol: Possible Inorganic Tracers of Specific Events

Clara Turetta <sup>1,2</sup>, Matteo Feltracco <sup>1,2,\*</sup>, Elena Barbaro <sup>1,2</sup>, Andrea Spolaor <sup>1,2</sup>, Carlo Barbante <sup>1,2</sup> and Andrea Gambaro <sup>1,2</sup>

- <sup>1</sup> Institute of Polar Sciences, National Research Council of Italy (ISP-CNR), 30172 Venice, Italy; clara.turetta@cnr.it (C.T.); elena.barbaro@cnr.it (E.B.); andrea.spolaor@cnr.it (A.S.); barbante@unive.it (C.B.); gambaro@unive.it (A.G.)
- <sup>2</sup> Department of Environmental Sciences, Informatic and Statistics, University Ca' Foscari, 30172 Venice, Italy
- \* Correspondence: matteo.feltracco@unive.it; Tel.: +39-041-2348545

**Table S1.** Start and end date of each aerosol sample collected at Gruvebadet (Ny Ålesund) during 2018–2019 campaign.

| Sample   | Start Date       | End Date      | Sample   | Start Date       | End Date         |
|----------|------------------|---------------|----------|------------------|------------------|
| C2018_01 | 26 February 2018 | 03 March 2018 | C2018_24 | 13 July 2018     | 19 July 2018     |
| C2018_02 | 03 March 2018    | 09 March 2018 | C2018_25 | 19 July 2018     | 25 July 2018     |
| C2018_03 | 09 March 2018    | 15 March 2018 | C2018_26 | 25 July 2018     | 31 July 2018     |
| C2018_04 | 15 March 2018    | 21 March 2018 | C2018_27 | 31 July 2018     | 06 August 2018   |
| C2018_05 | 21 March 2018    | 27 March 2018 | C2018_28 | 07 August 2018   | 13 August 2018   |
| C2018_06 | 27 March 2018    | 02 April 2018 | C2018_29 | 13 August 2018   | 19 August 2018   |
| C2018_07 | 02 April 2018    | 08 April 2018 | C2018_30 | 19 August 2018   | 25 August 2018   |
| C2018_08 | 08 April 2018    | 14 April 2018 | C2018_31 | 03 October 2018  | 09 October 2018  |
| C2018_09 | 14 April 2018    | 20 April 2018 | C2018_32 | 09 October 2018  | 15 October 2018  |
| C2018_10 | 20 April 2018    | 26 April 2018 | C2018_33 | 15 October 2018  | 25 October 2018  |
| C2018_11 | 26 April 2018    | 02 May 2018   | C2018_34 | 25 October 2018  | 05 November 2018 |
| C2018_12 | 02 May 2018      | 08 May 2018   | C2018_35 | 05 November 2018 | 13 November 2018 |
| C2018_13 | 08 May 2018      | 14 May 2018   | C2018_36 | 13 November 2018 | 23 November 2018 |
| C2018_14 | 14 May 2018      | 20 May 2018   | C2018_37 | 23 November 2018 | 03 December 2018 |
| C2018_15 | 20 May 2018      | 26 May 2018   | C2018_38 | 03 December 2018 | 14 December 2018 |
| C2018_16 | 26 May 2018      | 01 June 2018  | C2018_39 | 14 December 2018 | 24 December 2018 |
| C2018_17 | 01 June 2018     | 07 June 2018  | C2018_40 | 24 December 2018 | 03 January 2019  |
| C2018_18 | 07 June 2018     | 13 June 2018  | C2019_01 | 03 January 2019  | 15 January 2019  |

|          |              |              |          |                  |                  |
|----------|--------------|--------------|----------|------------------|------------------|
| C2018_19 | 13 June 2018 | 19 June 2018 | C2019_02 | 15 January 2019  | 24 January 2019  |
| C2018_20 | 19 June 2018 | 25 June 2018 | C2019_03 | 24 January 2019  | 03 February 2019 |
| C2018_21 | 25 June 2018 | 01 July 2018 | C2019_04 | 03 February 2019 | 13 February 2019 |
| C2018_22 | 01 July 2018 | 07 July 2018 | C2019_05 | 13 February 2019 | 19 February 2019 |
| C2018_23 | 07 July 2018 | 13 July 2018 | C2019_06 | 19 February 2019 | 26 February 2019 |

**Table S2.** Seasonal PM<sub>10</sub> concentration of wsTE. Concentrations are shown in pg m<sup>-3</sup>, standard deviations are in brackets.

| wsTE                     | Win '18     | Spr       | Sum         | Aut         | Win '18-'19 |
|--------------------------|-------------|-----------|-------------|-------------|-------------|
| Li                       | 9 (1)       | 5 (2)     | 5 (2)       | 6 (1)       | 10 (2)      |
| Be                       | 0,19 (0,04) | 0,1 (0,1) | 0,09 (0,04) | 0,06 (0,03) | 0,2 (0,1)   |
| Mg (ng m <sup>-3</sup> ) | 30 (16)     | 25 (9)    | 24 (7)      | 33 (9)      | 49 (15)     |
| K (ng m <sup>-3</sup> )  | 7 (3)       | 4 (2)     | 5 (1)       | 5 (1)       | 9 (1)       |
| Ca (ng m <sup>-3</sup> ) | 1,3 (0,3)   | 1,4 (0,4) | 0,9 (0,4)   | 0,7 (0,1)   | 0,9 (0,3)   |
| Al (ng m <sup>-3</sup> ) | 4 (2)       | 10 (10)   | 2 (3)       | 1 (1)       | 4 (2)       |
| V                        | 25 (6)      | 24 (17)   | 18 (6)      | 23 (16)     | 50 (21)     |
| Cr                       | 195 (86)    | 198 (111) | 153 (53)    | 80 (48)     | 154 (69)    |
| Mn                       | 186 (72)    | 189 (107) | 109 (45)    | 150 (96)    | 227 (93)    |
| Fe (ng m <sup>-3</sup> ) | 0,5 (0,2)   | 0,8 (0,6) | 0,7 (0,2)   | 0,4 (0,3)   | 1,5 (0,9)   |
| Co                       | 7 (1)       | 4 (2)     | 2,4 (0,7)   | 3 (1)       | 4 (1)       |
| Ni                       | 166 (73)    | 134 (74)  | 105 (51)    | 63 (18)     | 71 (33)     |
| Cu                       | 378 (119)   | 456 (117) | 422 (408)   | 192 (67)    | 398 (140)   |
| Zn (ng m <sup>-3</sup> ) | 3,9 (0,9)   | 4 (2)     | 4 (2)       | 0,7 (0,2)   | 1,5 (0,6)   |
| Ga                       | 0,3 (0,1)   | 0,4 (0,3) | 0,2 (0,1)   | 0,1 (0,2)   | 2 (2)       |
| As                       | 21 (8)      | 17 (16)   | 9 (4)       | 13 (9)      | 86 (66)     |
| Rb                       | 7 (2)       | 5 (4)     | 3 (1)       | 3 (1)       | 15 (6)      |
| Sr                       | 315 (107)   | 350 (73)  | 253 (124)   | 208 (46)    | 311 (87)    |
| Ag                       | 1,9 (0,4)   | 0,4 (0,5) | 0,3 (0,3)   | 0,4 (0,4)   | 0,3 (0,3)   |
| Cd                       | 7 (3)       | 5 (5)     | 2 (1)       | 2 (2)       | 13 (9)      |
| Cs                       | 0,7 (0,2)   | 0,5 (0,5) | 0,2 (0,1)   | 0,3 (0,1)   | 1,8 (0,9)   |
| Ba                       | 512 (290)   | 171 (134) | 156 (64)    | 158 (177)   | 113 (59)    |
| Tl                       | 1,6 (0,6)   | 0,4 (0,4) | 0,5 (0,6)   | 0,1 (0,1)   | 1,1 (0,8)   |
| Pb                       | 109 (31)    | 84 (76)   | 76 (40)     | 65 (53)     | 425 (281)   |
| Bi                       | 0,9 (0,6)   | 0,4 (0,5) | 0,2 (0,2)   | 0,2 (0,2)   | 1 (1)       |
| U                        | 0,5 (0,1)   | 0,3 (0,2) | 0,3 (0,2)   | 0,2 (0,1)   | 0,4 (0,2)   |

**Table S3.** Seasonal PM<sub>10</sub> concentration of wsREE. Concentrations are shown in pg m<sup>-3</sup>, standard deviations are in brackets.

| wsREE | Win '18       | Spr           | Sum           | Aut           | Win '18-'19   |
|-------|---------------|---------------|---------------|---------------|---------------|
| Y     | 1.3 (0.2)     | 1.1 (0.6)     | 0.6 (0.1)     | 0.6 (0.2)     | 0.9 (0.3)     |
| La    | 0.7 (0.1)     | 1 (0.7)       | 0.4 (0.1)     | 0.3 (0.2)     | 0.7 (0.2)     |
| Ce    | 1.7 (0.5)     | 3 (2)         | 1.3 (0.7)     | 0.7 (0.4)     | 1.5 (0.6)     |
| Pr    | 0.16 (0.05)   | 0.2 (0.1)     | 0.08 (0.02)   | 0.08 (0.04)   | 0.14 (0.04)   |
| Nd    | 0.8 (0.2)     | 0.8 (0.6)     | 0.3 (0.1)     | 0.3 (0.2)     | 0.6 (0.2)     |
| Sm    | 0.19 (0.05)   | 0.2 (0.1)     | 0.1 (0.02)    | 0.09 (0.04)   | 0.14 (0.04)   |
| Eu    | 0.06 (0.02)   | 0.05 (0.03)   | 0.02 (0.01)   | 0.02 (0.01)   | 0.03 (0.01)   |
| Gd    | 0.21 (0.04)   | 0.2 (0.1)     | 0.11 (0.03)   | 0.1 (0.04)    | 0.16 (0.04)   |
| Tb    | 0.04 (0.01)   | 0.04 (0.02)   | 0.02 (0.005)  | 0.02 (0.01)   | 0.02 (0.01)   |
| Dy    | 0.24 (0.04)   | 0.2 (0.1)     | 0.1 (0.03)    | 0.1 (0.03)    | 0.15 (0.05)   |
| Ho    | 0.05 (0.01)   | 0.04 (0.03)   | 0.02 (0.01)   | 0.02 (0.01)   | 0.03 (0.01)   |
| Er    | 0.13 (0.02)   | 0.1 (0.06)    | 0.06 (0.01)   | 0.05 (0.02)   | 0.07 (0.03)   |
| Tm    | 0.015 (0.002) | 0.016 (0.014) | 0.007 (0.001) | 0.006 (0.002) | 0.009 (0.003) |

|        |               |               |               |               |              |
|--------|---------------|---------------|---------------|---------------|--------------|
| Yb     | 0.11 (0.02)   | 0.08 (0.04)   | 0.05 (0.01)   | 0.04 (0.01)   | 0.06 (0.02)  |
| Lu     | 0.016 (0.004) | 0.016 (0.013) | 0.007 (0.001) | 0.007 (0.003) | 0.01 (0.004) |
| Th     | 0.3 (0.1)     | 0.2 (0.1)     | 0.14 (0.05)   | 0.06 (0.04)   | 0.12 (0.09)  |
| ΣwsREE | 6 (1)         | 7 (4)         | 3 (1)         | 3 (1)         | 5 (1)        |

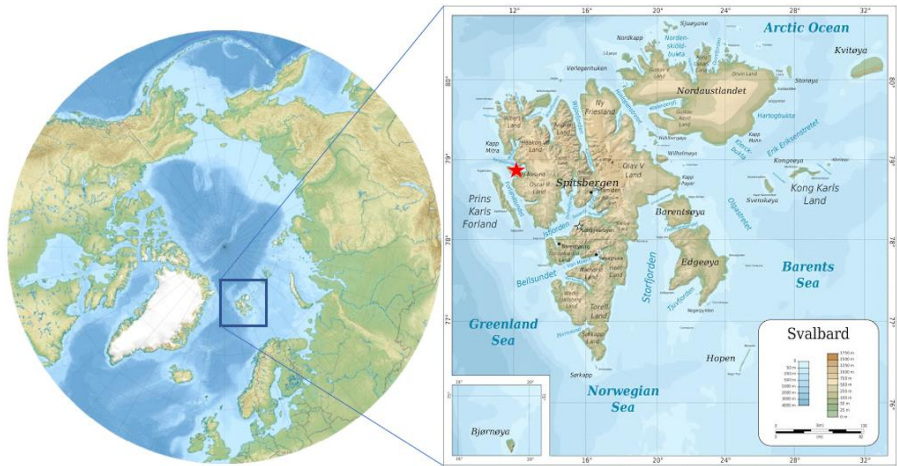

**Figure S1.** Glacial Arctic Ocean and Svalbard Archipelago. The red star points to the position of Ny-Ålesund.

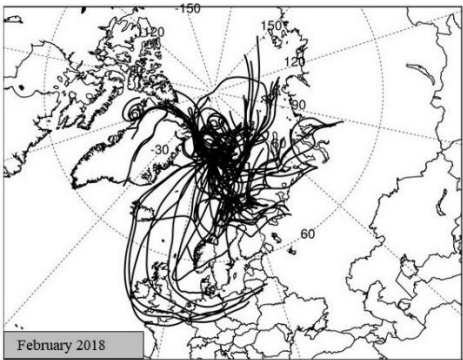

A

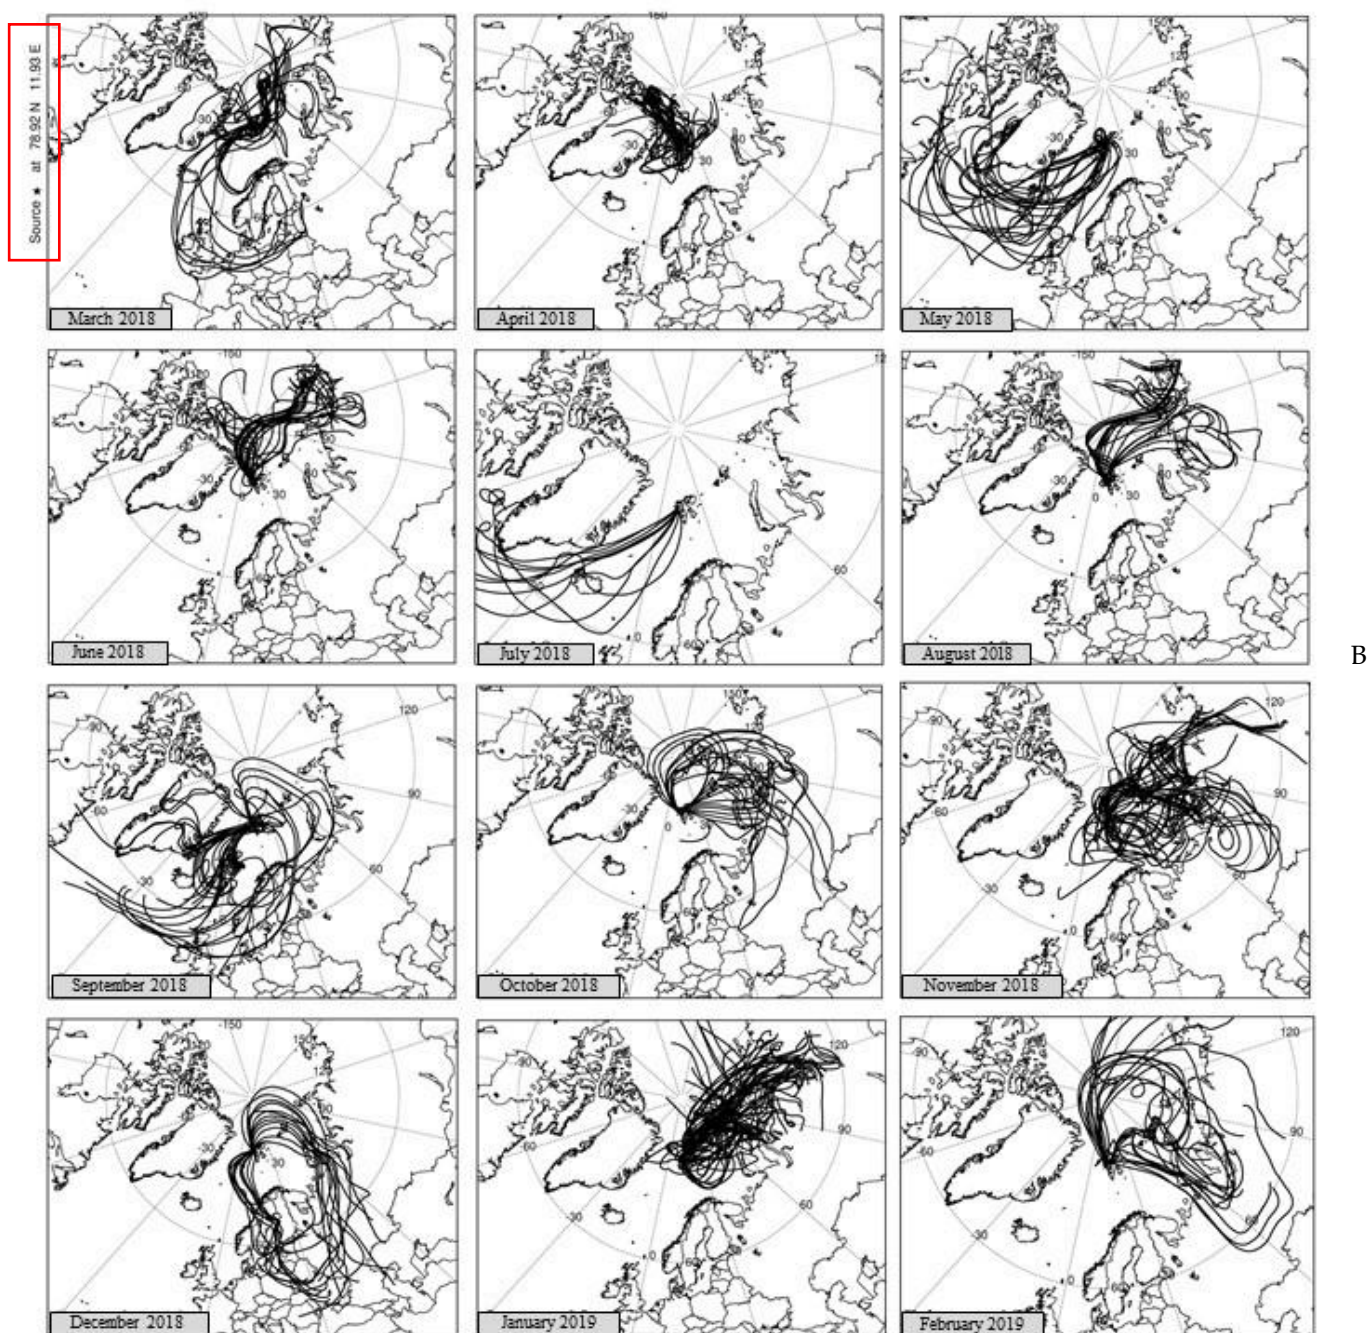

**Figure S2.** (A) Monthly back trajectories for February 2018. (B) Monthly back trajectories from March 2018 to February 2019. The black star points to the position of Ny-Ålesund.



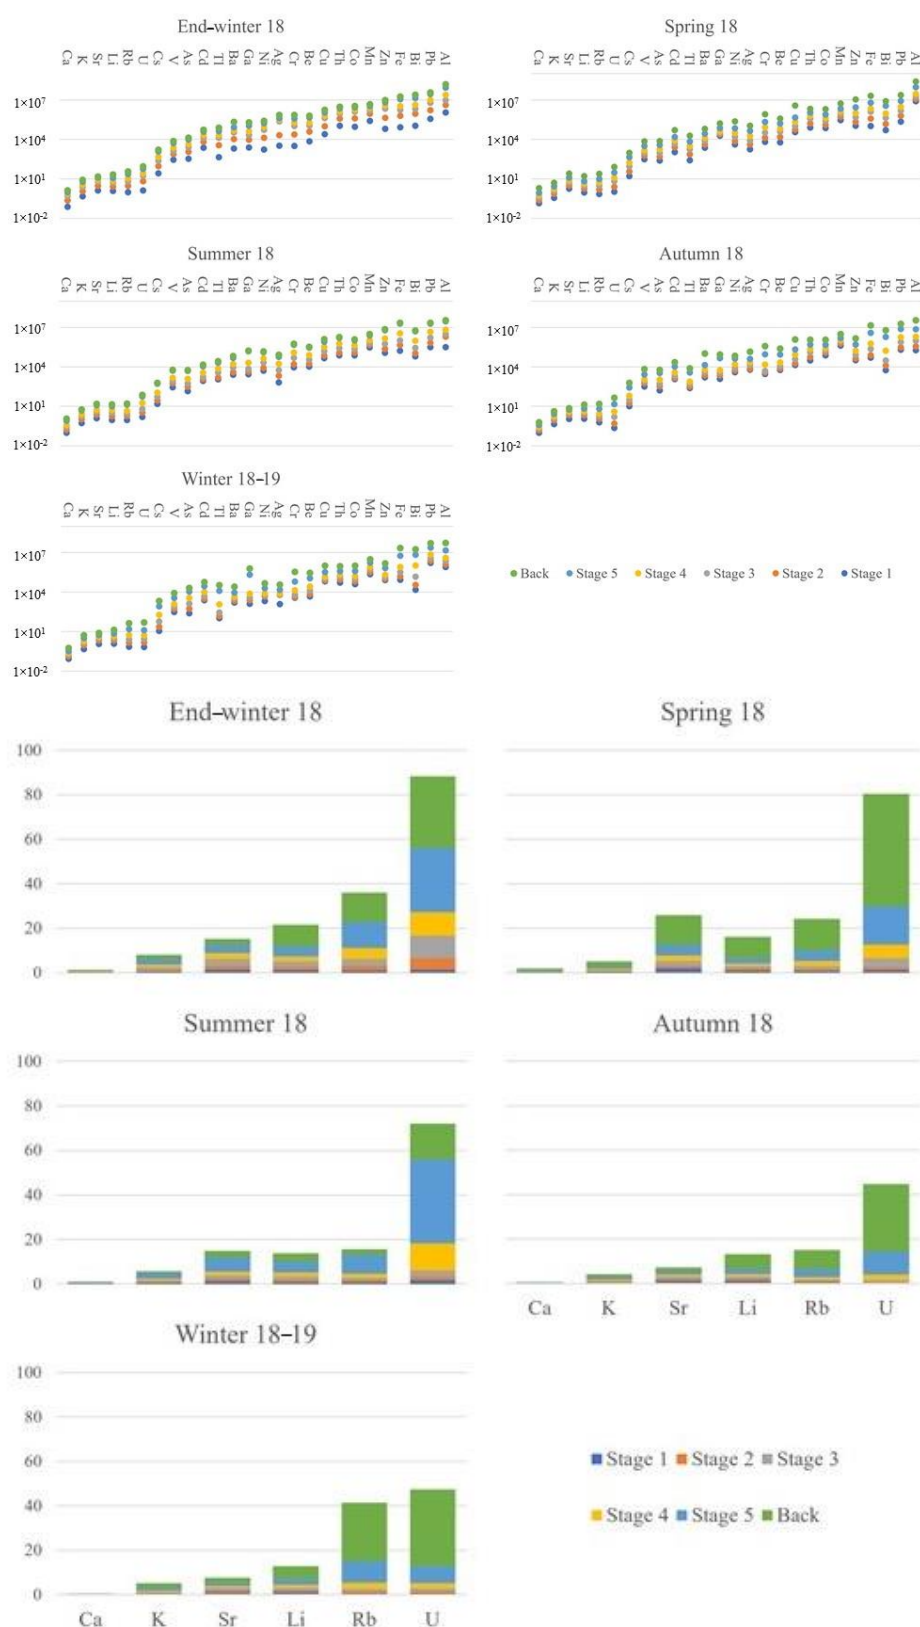

A

B

**Figure S3.** (A) Seawater mean composition Enrichment Factors calculated for seasonal averages. The composition of seawater is from Nozaki (2010) [27]. Dimensional size for: Back <0.49  $\mu\text{m}$ , Stage 5: 0.95–0.49  $\mu\text{m}$ , Stage 4—1.5–0.95  $\mu\text{m}$ , Stage 3—3–1.5  $\mu\text{m}$ , Stage 2—7.2–3, and Stage 1—10–7.2  $\mu\text{m}$ . (B) Seawater mean composition Enrichment Factors calculated for seasonal averages. Only the marine source elements are reported to highlight the differences between seasons of the marine input. Dimensional size for: Back <0.49  $\mu\text{m}$ , Stage 5—0.95–0.49  $\mu\text{m}$ , Stage 4—1.5–0.95  $\mu\text{m}$ , Stage 3—3–1.5  $\mu\text{m}$ , Stage 2—7.2–3, and Stage 1—10–7.2  $\mu\text{m}$ .

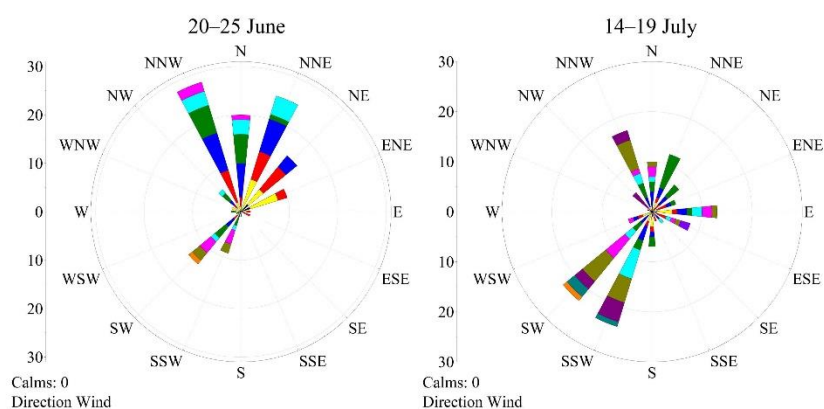

**Figure S4.** Wind roses for the 25 June and 19 July samples. Data of wind speed and direction are relative to AWI station at 10 m of elevation [1].

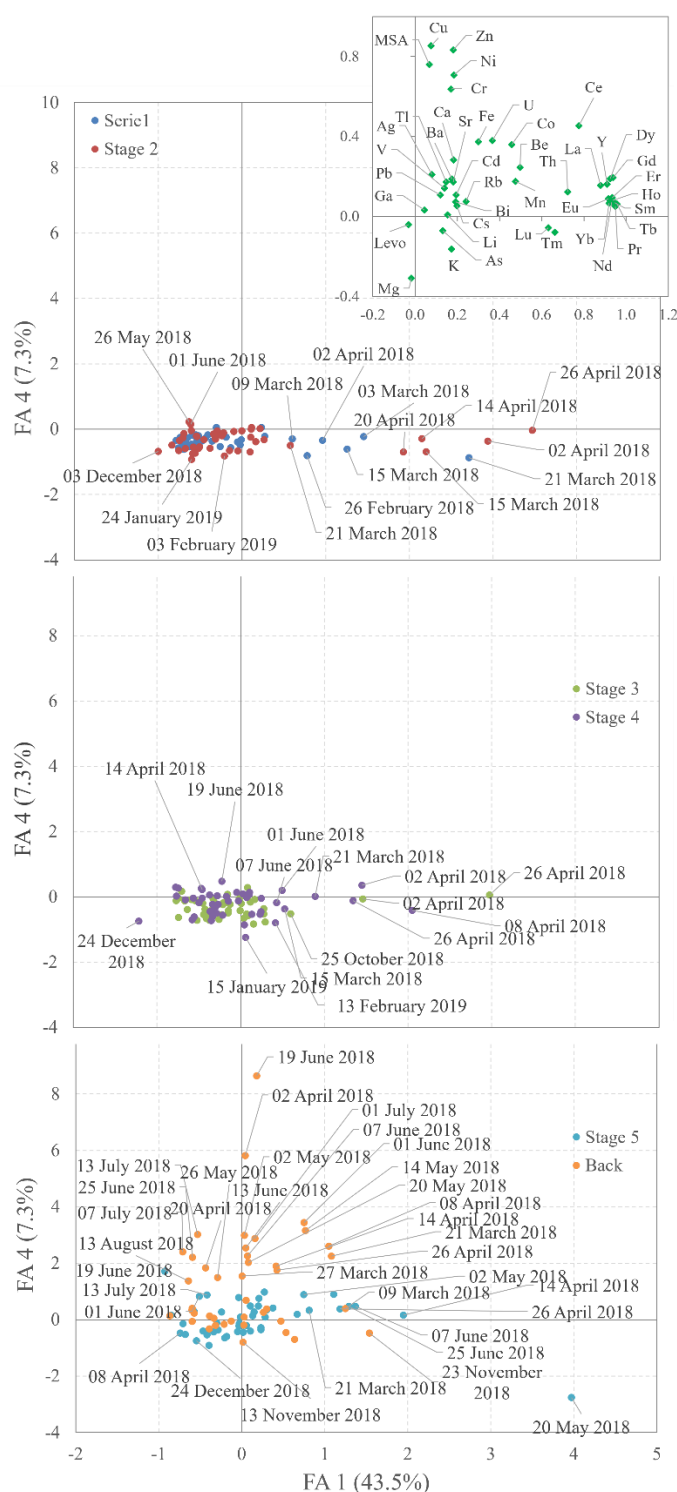

**Figure S5.** Results of the Factor Analysis: factor 1 vs. factor 4. The samples were subdivided in three separated graphs on dimensional basis. From top to bottom: 10–7.2 and 7.2–3.0  $\mu\text{m}$  fractions, 3.0–1.5 and 1.5–0.95  $\mu\text{m}$  fractions, and 0.95–0.49 and <0.49  $\mu\text{m}$  fractions. The graph in the top right-hand corner shows factor loadings.

## References

1. Maturilli, M. Continuous meteorological observations at station Ny-Ålesund (2011–08 et seq). Alfred Wegener Institute - Research Unit Potsdam, PANGAEA. 2020. Available online: <https://doi.pangaea.de/10.1594/PANGAEA.914979> (accessed on 23 April 2021).
